# Supplementary material for: Intelligent Behavior Data Analysis for Internet Addiction
Source: Hindawi journal article supplement (doi:10.1155/2019/2753152), 2019-11-29
Supplement: f1 [file 2753152.f1.docx]

## Supplementary Materials

### Internet Addiction Scale

There are 5 descriptions below. Please read them carefully and choose the degree of conformity of each description according to your actual situation.

Table S1: Internet Usage Survey of College Student

| number | description | very inconsistent (1) | inconsistent (2) | consistent (3) | very consistent (4) |
| --- | --- | --- | --- | --- | --- |
| 1 | I have been told more than once that I spent too much time on the internet. |  |  |  |  |
| 2 | I find myself getting online longer and longer. |  |  |  |  |
| 3 | No matter how tired, I always feel very spiritual when I am online. |  |  |  |  |
| 4 | I have slept less than 4 hours because of the Internet. |  |  |  |  |
| 5 | I am used to reducing sleep time so that I can spend more time online. |  |  |  |  |
